# Supplementary material for: The Chromosome-Scale Genomes of Exserohilum rostratum and Bipolaris zeicola Pathogenic Fungi Causing Rice Spikelet Rot Disease
Source: MDPI journal article supplement (doi:10.3390/jof9020177), 2023-01-28
Supplement: s1 [file s1]

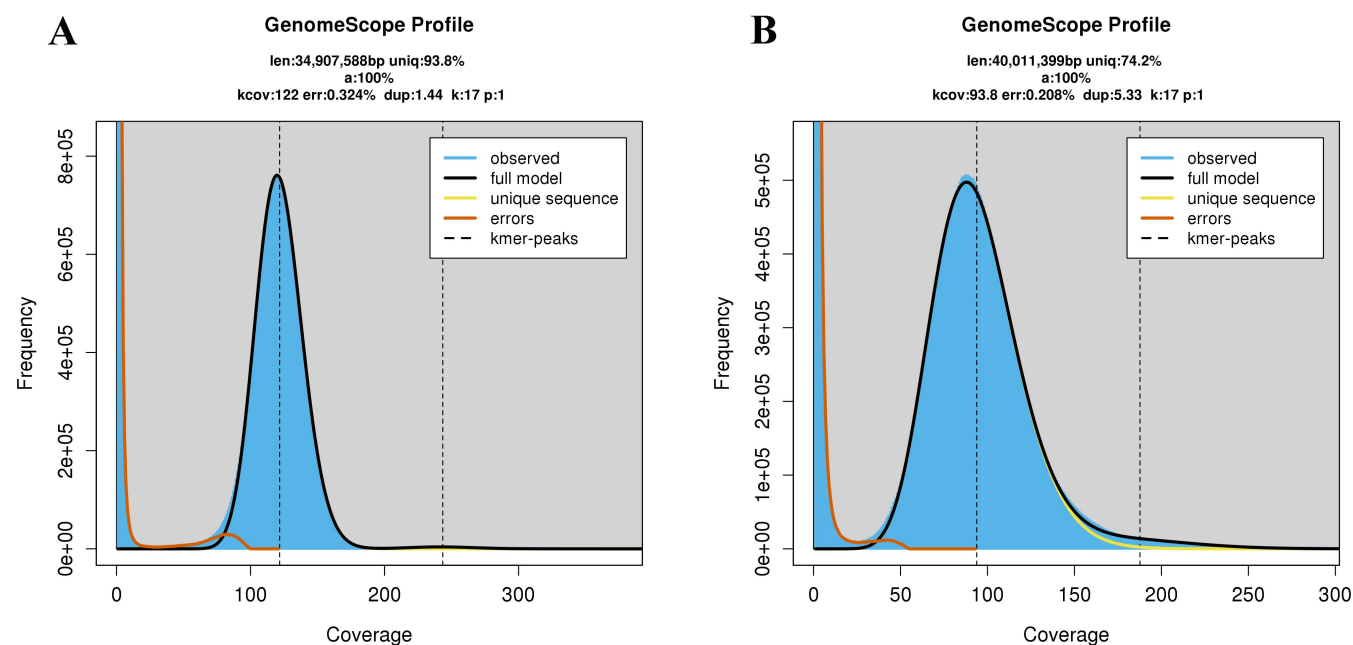

Figure S1. Assessing the genome size of *E. rostratum* LWI (A) and *B. zeicola* LWII (B).

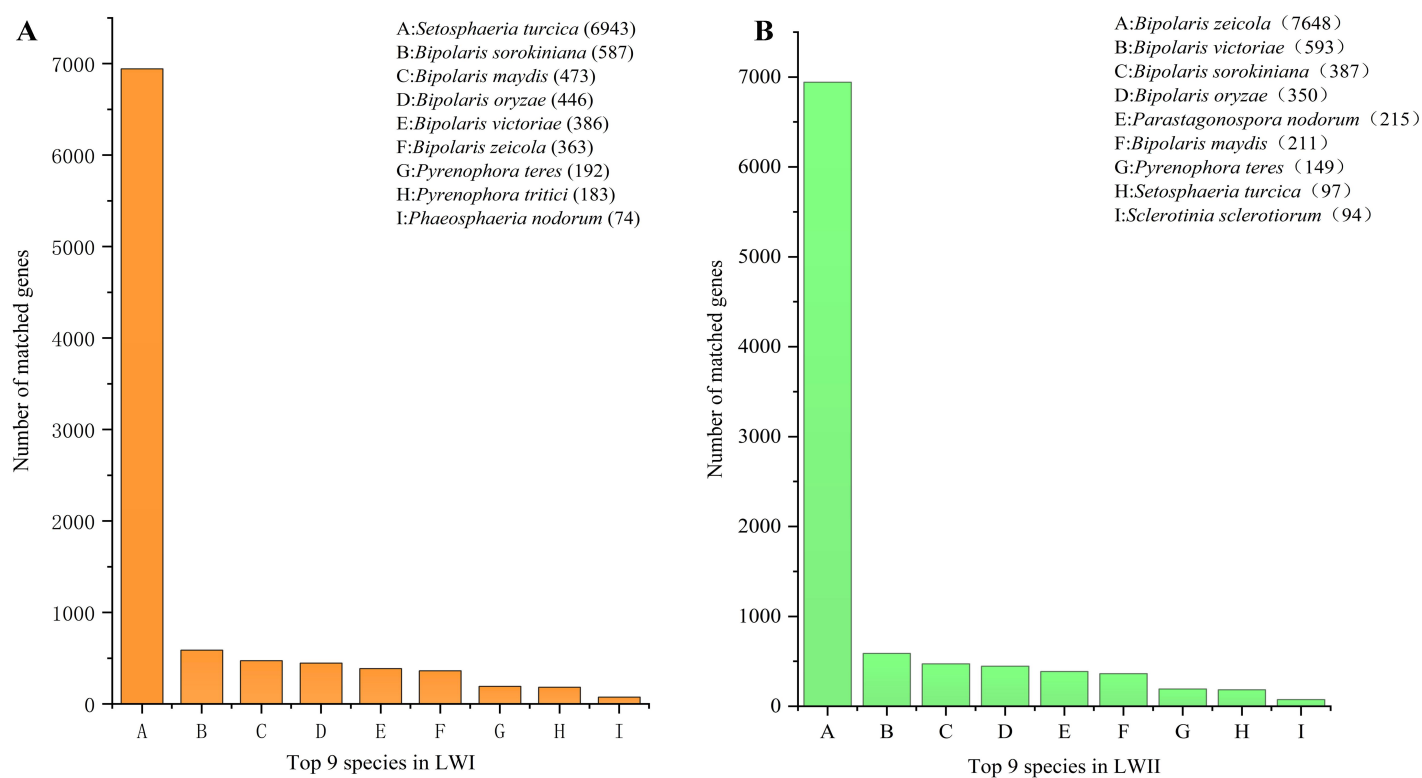

Figure S2. Predicted proteins between different fungal species using the Nr database for the *E. rostratum* LWI (A) and *B. zeicola* LWII (B) genomes.

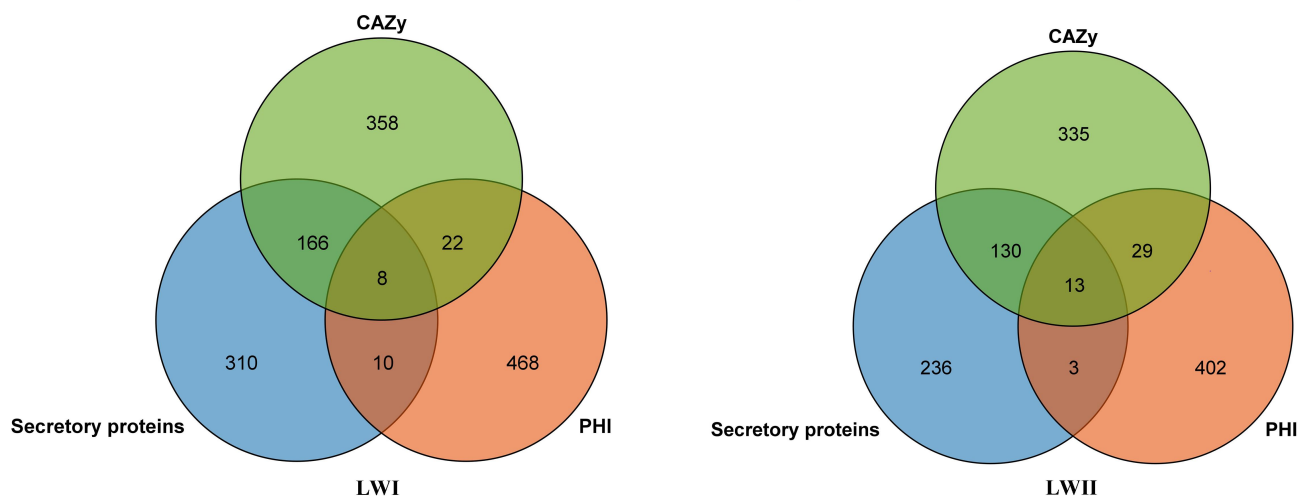

Figure S3. Intersection of annotation results of secreted protein genes, PHI genes, and CAZy genes of *E. rostratum* LWI and *B. zeicola* LWII.
